# Supplementary material for: Different interactions between a metal electrode and an organic layer and their different electrical bistability performances
Source: Royal Society of Chemistry journal article supplement (doi:10.1039/c4ra12893a), 2014-11-27
Supplement: c4ra12893a1.pdf [file c4ra12893a1.pdf]

Cite this: DOI: 10.1039/c0xx00000x

www.rsc.org/xxxxxx

ARTICLE TYPE

## Supporting Information

### Different interaction between metal electrode and organic layer and their different electrical bistability performances

Yong Ma<sup>a</sup>, Pei-Yang Gu<sup>a</sup>, Feng Zhou<sup>a</sup>, Hui-Long Dong<sup>b</sup>, You-Yong Li<sup>b</sup>, Qing-Feng Xu<sup>\*,a</sup>, Jian-Mei Lu<sup>\*,a</sup>,  
5 Wan-Li Ma<sup>b</sup>

#### 1. <sup>1</sup>H NMR and <sup>13</sup>C NMR of 2PyNI

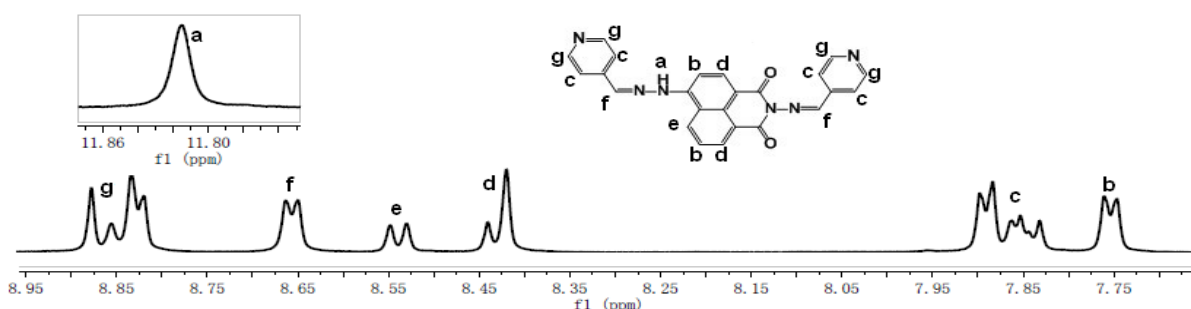

Figure S1. <sup>1</sup>H NMR spectrum of 2PyNI in DMSO-*d*<sub>6</sub>.

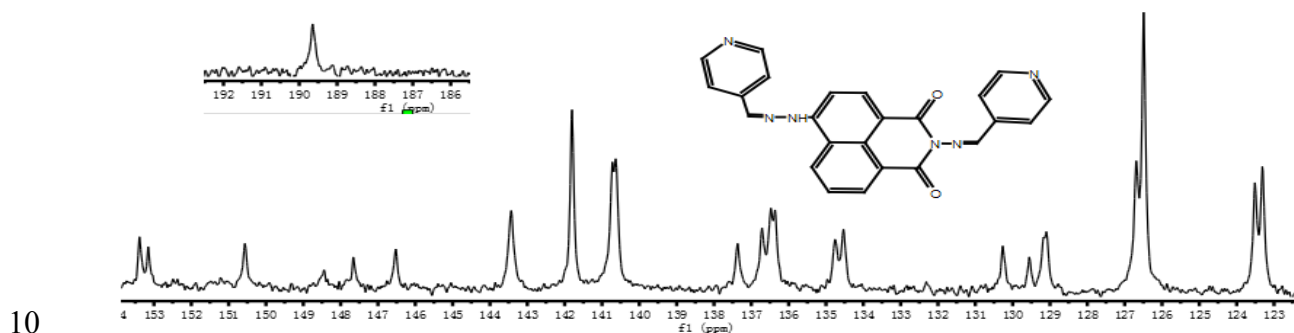

Figure S2. <sup>13</sup>C NMR spectrum of 2PyNI in CF<sub>3</sub>COOD.

#### 2. Thermo-gravimetric Analysis (TGA) for bulk powder of 2PyNI.

Cite this: DOI: 10.1039/c0xx00000x

www.rsc.org/xxxxxx

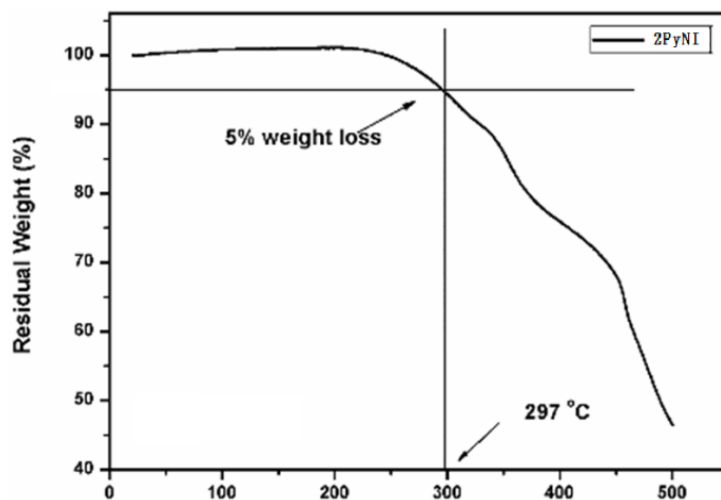

**Figure S3.** TGA curve of **2PyNI**.

The thermal stabilities of **2PyNI** were evaluated by TGA under a nitrogen atmosphere. As shown in the TGA curves, the thermal decomposition temperatures (the 5% weight-lost temperature) of **2PyNI** 5 was up to 297 °C, respectively. The good-thermal stability of **2PyNI** would endure heat deterioration in the memory devices.

### 3. Scanning Electron Microscope (SEM) images of the devices

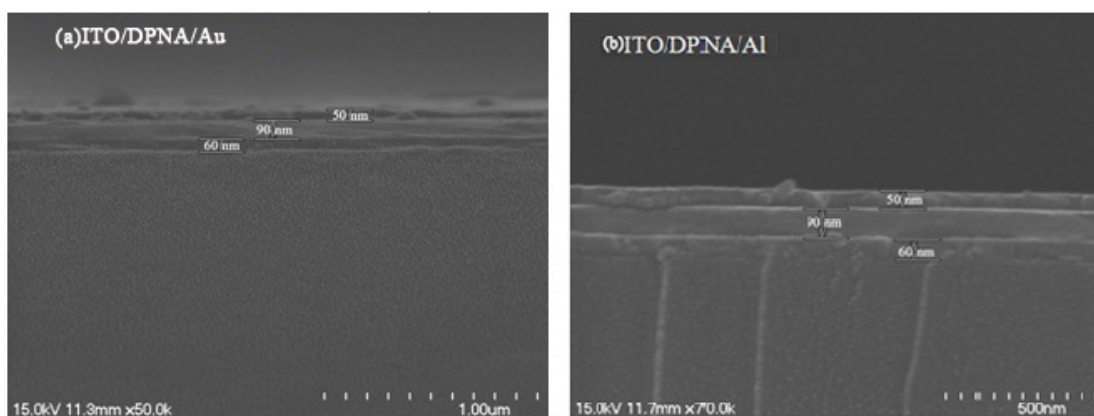

**Figure S4.** The cross section images of devices: (a) ITO/**2PyNI**/Au; (b) ITO/**2PyNI**/Al.

10

### 4. High resolution mass spectrometry (HRMS) of **2PyNI**

Cite this: DOI: 10.1039/c0xx00000x

www.rsc.org/xxxxxx

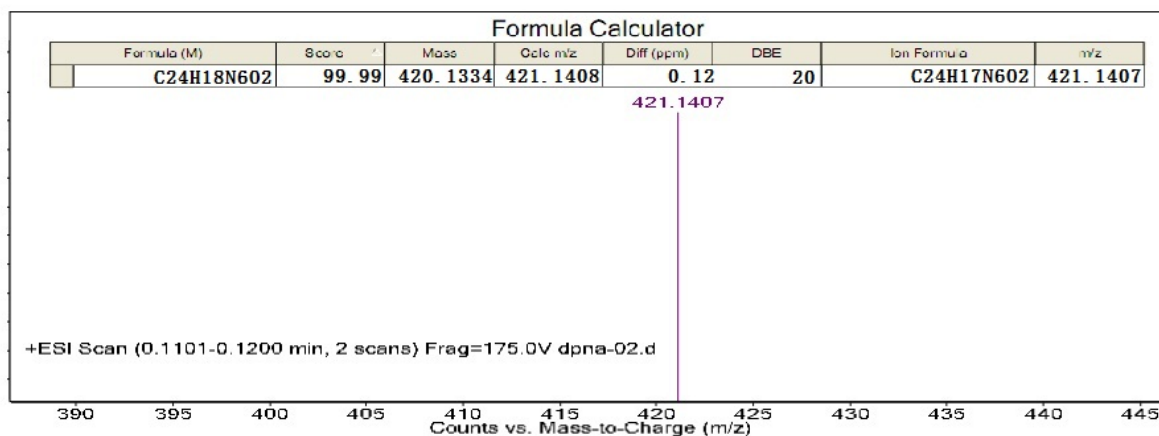

Figure S5. HRMS spectrum of 2PyNI.

## 5. Crystallographic data of 2PyNI

5 Table S1. Crystallographic data for 2PyNI

| Compound           | 2PyNI                                                         |
|--------------------|---------------------------------------------------------------|
| Formula            | C <sub>24</sub> H <sub>20</sub> N <sub>6</sub> O <sub>4</sub> |
| F <sub>w</sub>     | 456.46                                                        |
| T(K)               | 223(2)                                                        |
| Crystal system     | orthorhombic                                                  |
| Space group        | P 21 21 21                                                    |
| a (Å)              | 4.6051(10)                                                    |
| b (Å)              | 13.887(3)                                                     |
| c (Å)              | 33.216(7)                                                     |
| α (deg)            | 90                                                            |
| β (deg)            | 90                                                            |
| γ (deg)            | 90                                                            |
| V(Å <sup>3</sup> ) | 2124.1(8)                                                     |

Cite this: DOI: 10.1039/c0xx00000x

www.rsc.org/xxxxxx

---

|                             |        |
|-----------------------------|--------|
| Z                           | 4      |
| $D_{\text{calc}}$           | 1.427  |
| $\mu(\text{mm}^{-1})$       | 0.101  |
| F (000)                     | 952    |
| $\theta_{\text{max}}$ (deg) | 27.44  |
| Reflections Collected       | 11621  |
| Independent reflections     | 4749   |
| Observed reflections        | 3398   |
| Parameters refined          | 320    |
| $R(I > 2\sigma(I))$         | 0.0681 |
| $wR_2(\text{all data})$     | 0.1490 |
| GOF on $F^2$                | 1.102  |

---

## 6. The extended retention time characterization of device 2

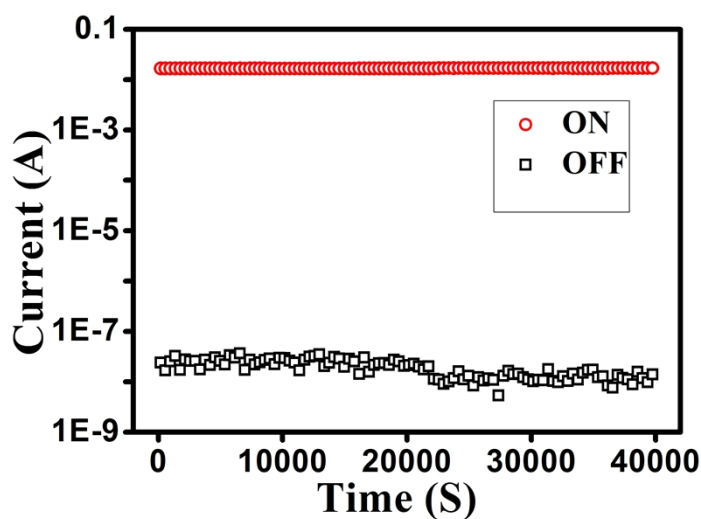

5 **Figure S6.** The effect of retention time of the memory device under a constant stress of -1.0 V

Cite this: DOI: 10.1039/c0xx00000x

www.rsc.org/xxxxxx

## 7. The Temperature dependence characterization of device 1 and 2 for ON state

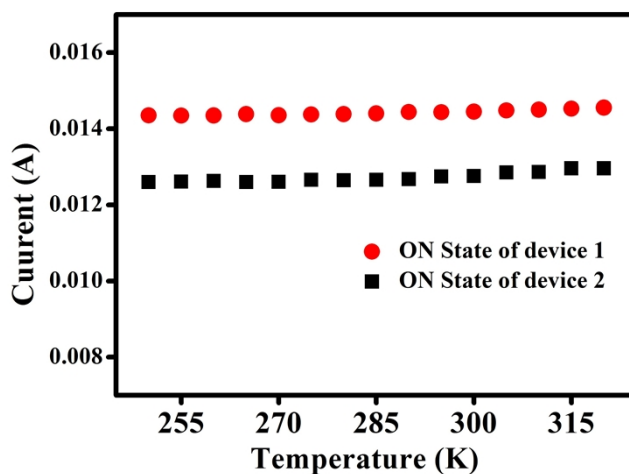

**Figure S7.** Temperature dependence of the current for the ON states of devices 1 and 2.

The temperature dependence (between 250 and 320 K) of the current for ON state of device 1 and 2 were measured. The current was subsequently measured at 1 V while the temperature was swept at a speed of 1.0 K/min. It was found that the current for ON state of device 1 and 2 did not show the feature of conductors and was weakly affected by the temperature.
